# Supplementary material for: Polypyrrole Hollow Microspheres as Echogenic Photothermal Agent for Ultrasound Imaging Guided Tumor Ablation
Source: PubMed Central journal article supplement — Sci Rep. 2013 Aug 5;3:2360. doi: 10.1038/srep02360 (PMC3733053; doi:10.1038/srep02360), 2013-08-05
Supplement: srep02360-s1.pdf [file srep02360-s1.pdf]

# Polypyrrole Hollow Microspheres as Echogenic Photothermal Agent for Ultrasound Imaging Guided Tumor Ablation

By Zhengbao Zha, Jinrui Wang, Enze Qu, Shuhai Zhang, Yushen Jin, Shumin Wang and Zhifei Dai

## Supporting Information

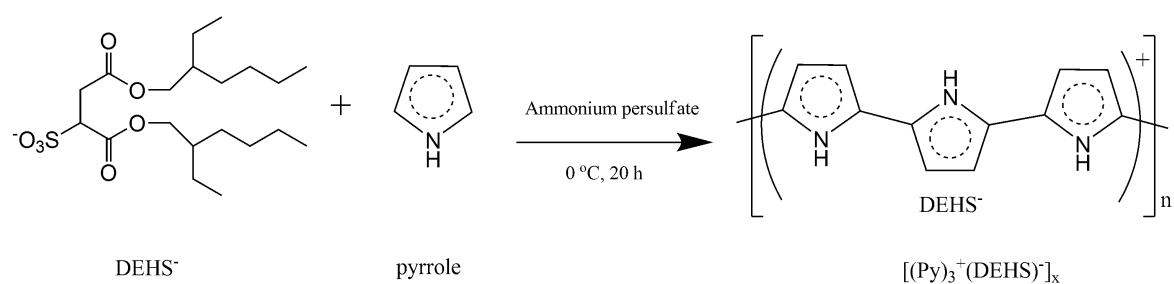

**Figure S1.** Synthetic route for soluble [(Py)<sub>3</sub><sup>+</sup>(DEHS)<sup>-</sup>]<sub>x</sub> complex.

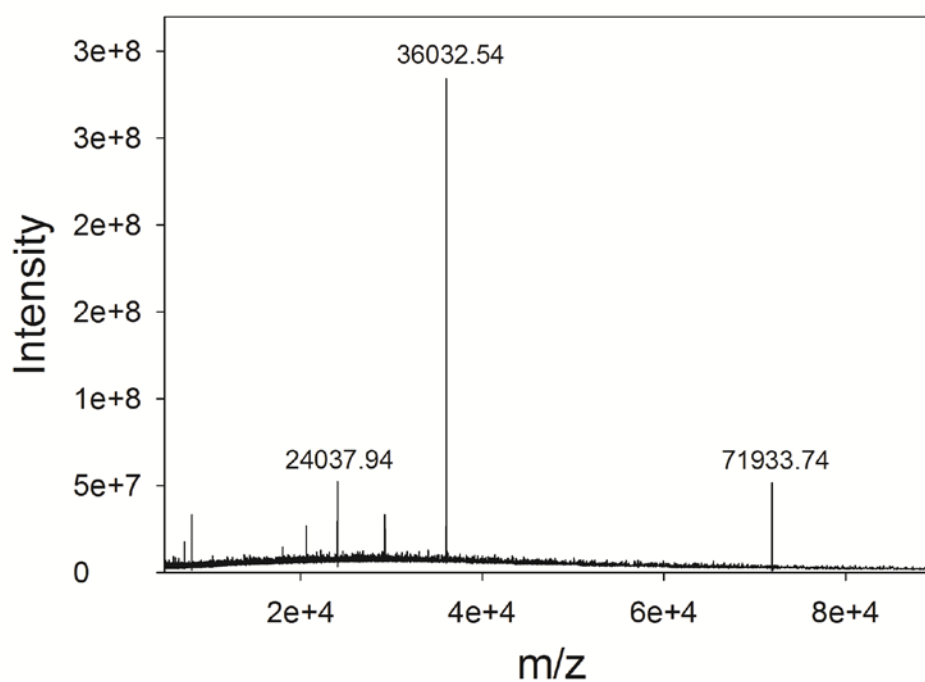

**Figure S2.** Mass Spectroscopy of as-prepared soluble [(Py)<sub>3</sub><sup>+</sup>(DEHS)<sup>-</sup>]<sub>x</sub> complex.

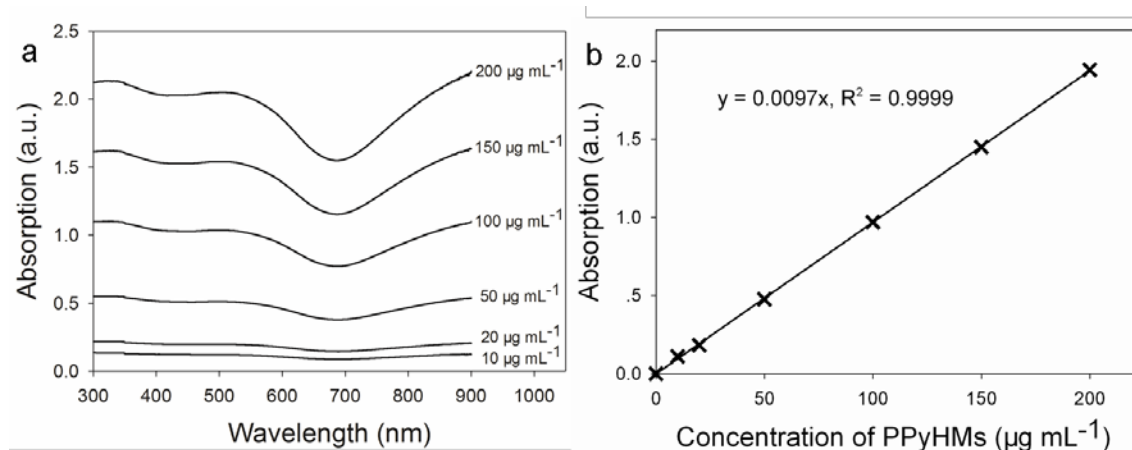

**Figure S3.** UV-vis-NIR spectrum of various concentrations of PPyHMs aqueous solution (a); the absorbance of PPyHMs at 808 nm increased as the concentration of PPyHMs increased (b).

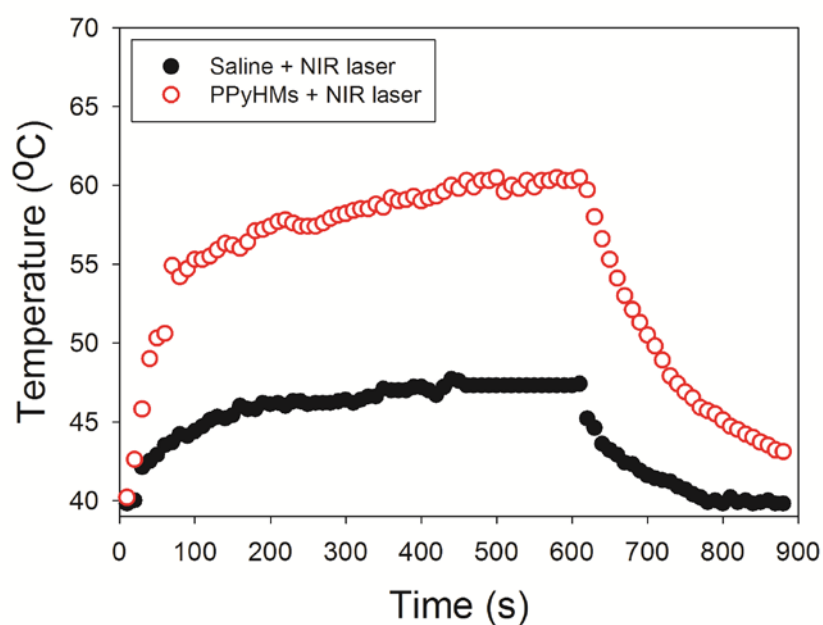

**Figure S4.** The temperature evolution on tumors of mice with and without PPyHMs during the PTT treatment.

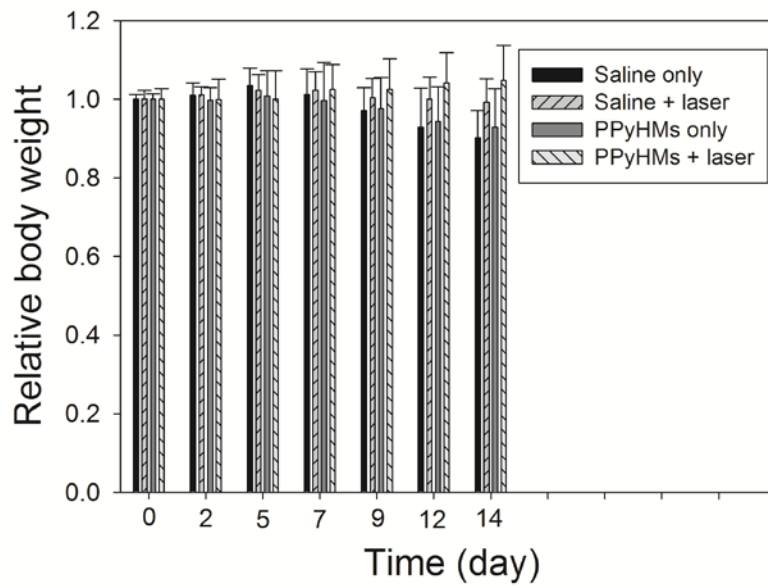

**Figure S5.** Relative body weight change of mice in different groups after the treatment.

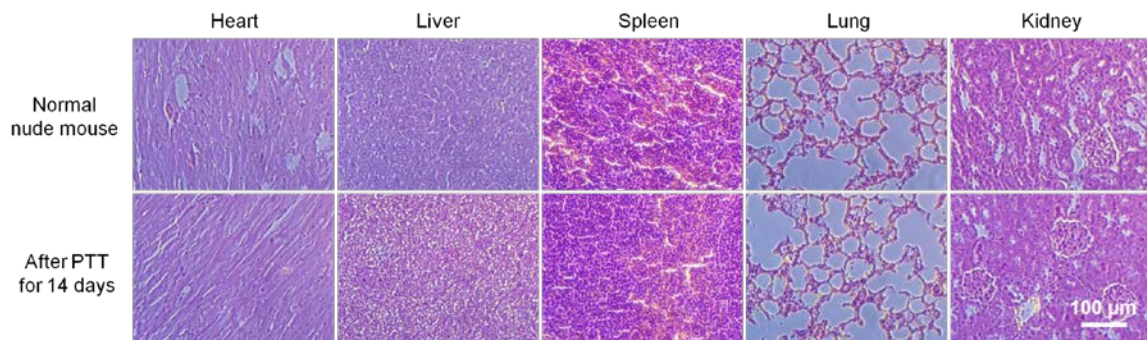

**Figure S6.** Micrographs of H&E stained organ slices from PPyHMs treated and normal healthy nude mouse at day 14 post treatment. Examined organs included heart, liver, spleen, lung and kidney. No obviously organ damage was observed for the treatment group.
